# Supplementary material
Source: PubMed Central journal article supplement (PMC1636702)
Supplement: pnas_0602543103_4.pdf [file pnas_0602543103_4.pdf]

**Table 2. Gravimetric and functional characterization of WT and G4D mice after Sham or TAC operation**

|                    | <b>WT-Sham</b> | <b>G4D-Sham</b> | <b>WT-TAC</b> | <b>G4D-TAC</b>            |
|--------------------|----------------|-----------------|---------------|---------------------------|
| preoperative BW, g | 24.7 ± 0.3     | 24.9 ± 0.5      | 24.3 ± 0.5    | 24.1 ± 0.2                |
| postmortem BW, g   | 25.8 ± 0.5     | 24.9 ± 0.5      | 24.6 ± 0.5    | 24.7 ± 0.4                |
| HW, mg             | 112.2 ± 3.8    | 102.6 ± 2.2*    | 132.8 ± 4.2*  | 138.8 ± 5.3               |
| LW, mg             | 134.7 ± 4.4    | 133.7 ± 2.9     | 139.4 ± 4.0   | 168.0 ± 12.8 <sup>#</sup> |
| TL, mm             | 16.6 ± 0.1     | 16.7 ± 0.1      | 16.5 ± 0.1    | 16.6 ± 0.1                |
| HW/BW, mg/g        | 4.3 ± 0.1      | 4.1 ± 0.1*      | 5.4 ± 0.1*    | 5.6 ± 0.2*                |
| HW/TL, mg/mm       | 6.7 ± 0.2      | 6.1 ± 0.2*      | 8.2 ± 0.2*    | 8.5 ± 0.2*                |
| LW/BW, mg/g        | 5.2 ± 0.1      | 5.4 ± 0.1       | 5.7 ± 0.2     | 6.7 ± 0.5 <sup>#</sup>    |
| LVEDD, mm          | 3.6 ± 0.1      | 3.5 ± 0.1       | 3.3 ± 0.1     | 3.8 ± 0.1 <sup>#</sup>    |
| PW, mm             | 0.5 ± 0.0      | 0.5 ± 0.0       | 0.7 ± 0.1     | 0.6 ± 0.0                 |
| LVESD, mm          | 1.8 ± 0.1      | 2.0 ± 0.1       | 1.6 ± 0.1     | 2.6 ± 0.1 <sup>#</sup>    |
| FS, %              | 48.5 ± 1.6     | 41.4 ± 2.3*     | 50.8 ± 2.6    | 32.7 ± 2.5 <sup>#</sup>   |

Abbreviations as in Table 1. \*,  $P < 0.05$  vs. WT-Sham. #,  $P < 0.05$  vs. WT-TAC.
